# Supplementary material for: Longitudinal relations among inattention, working memory, and academic achievement: testing mediation and the moderating role of gender
Source: PubMed Central journal article supplement (PMC4451022; doi:10.7717/peerj.939), 2015-05-19
Supplement: peerj-03-939-s001.pdf [file peerj-03-939-s001.pdf]

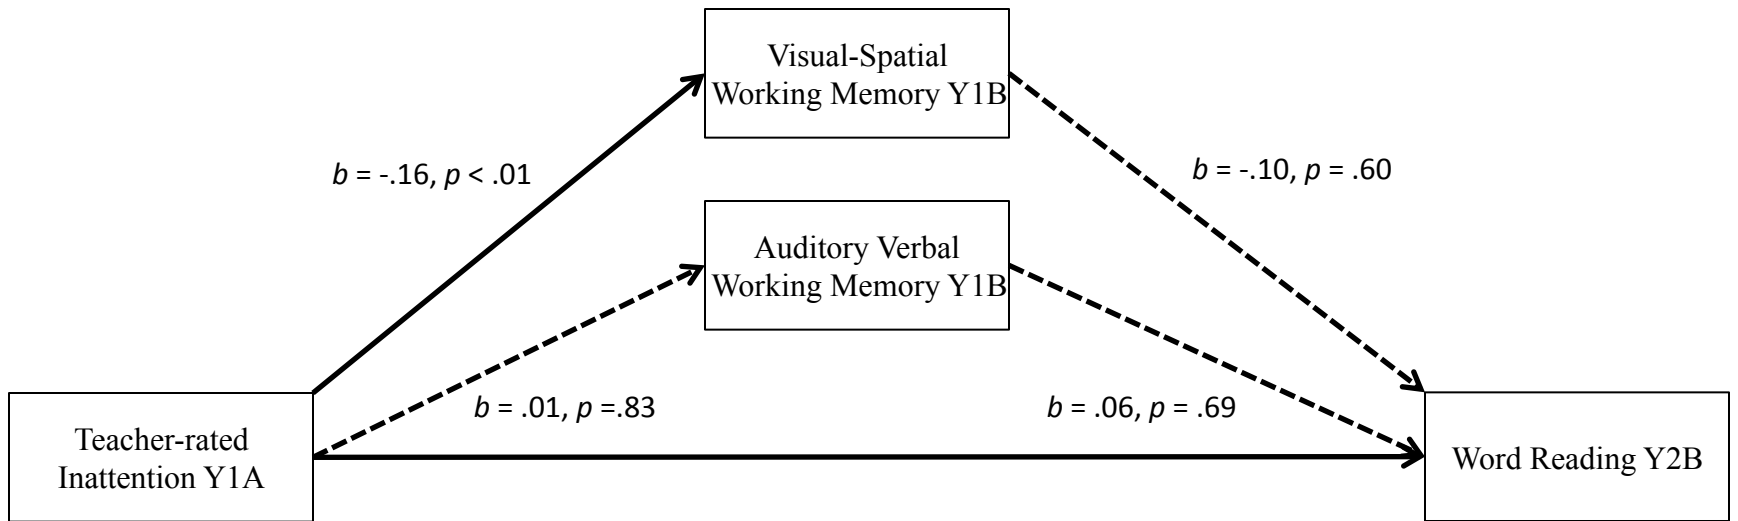

Direct effect,  $b = -0.02, CI [-0.10, 0.05]$

Conditional indirect effects:

visual-spatial WM for boys,  $b = -0.00, CI [-0.02, 0.01]$

visual-spatial WM for girls,  $b = -0.01, CI [-0.04, 0.02]$

auditory-verbal WM for boys,  $b = 0.00, CI [-0.00, 0.02]$

auditory-verbal WM for girls,  $b = 0.00, CI [-0.00, 0.01]$
