# Supplementary material for: Longitudinal relations among inattention, working memory, and academic achievement: testing mediation and the moderating role of gender
Source: PubMed Central journal article supplement (PMC4451022; doi:10.7717/peerj.939), 2015-05-19
Supplement: peerj-03-939-s005.pdf [file peerj-03-939-s005.pdf]

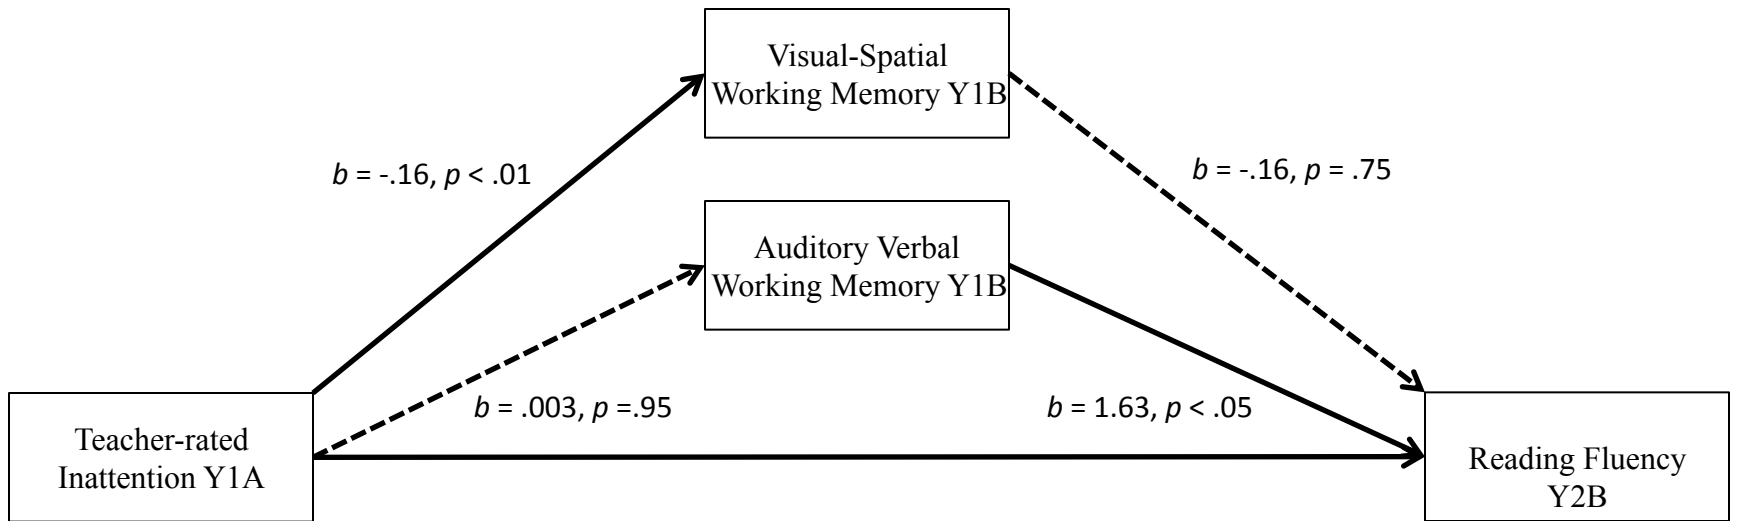

Direct effect,  $b = -0.27$ , CI [-0.54, 0.01]

Conditional indirect effects:

- visual-spatial WM for boys,  $b = 0.00$  CI [-0.02, 0.08]
- visual-spatial WM for girls,  $b = 0.02$  CI [-0.08, 0.15]
- auditory-verbal WM for boys,  $b = -0.06$  CI [-0.18, 0.00]
- auditory-verbal WM for girls,  $b = -0.03$  CI [-0.15, 0.02]
